# Supplementary material for: Population Genomics of Pooled Samples: Unveiling Symbiont Infrapopulation Diversity and Host–Symbiont Coevolution
Source: Life (Basel). 2023 Oct 14;13(10):2054. doi: 10.3390/life13102054 (PMC10608719; doi:10.3390/life13102054)
Supplement: Supplementary file 1 [file life-13-02054-s001.zip › Table S1.xlsx]

## Sheet: Sheet1
Host_ID	Sample_ID	Number_mites	Mite_species	Mite_authority	Host_species_scientific	Host_authority	Host_species_common	Collection_date	Collection_site	Collection_latitude	Collection_longitude	Host_age	Host_sex	Field_collector	SRA_Accession	Bioproject_Accession	Biosample_Accession
PROW953	PROW953_R1	1	Amerodectes protonotaria	Hernandes 2018	Protonotaria citrea	Boddaert 1783	Prothonotary Warbler	2021-05-01	Big Cypress Access, Illinois	37.3158	-88.992	Adult	M	Sara Lipshutz	SRR23920186	PRJNA946686	SAMN33830989
PROW953	PROW953_R5	5	Amerodectes protonotaria	Hernandes 2018	Protonotaria citrea	Boddaert 1783	Prothonotary Warbler	2021-05-01	Big Cypress Access, Illinois	37.3158	-88.992	Adult	M	Sara Lipshutz	SRR23920185	PRJNA946686	SAMN33830990
PROW953	PROW953_R20	20	Amerodectes protonotaria	Hernandes 2018	Protonotaria citrea	Boddaert 1783	Prothonotary Warbler	2021-05-01	Big Cypress Access, Illinois	37.3158	-88.992	Adult	M	Sara Lipshutz	SRR23920182	PRJNA946686	SAMN33830991
PROW954	PROW954_R1	1	Amerodectes protonotaria	Hernandes 2018	Protonotaria citrea	Boddaert 1783	Prothonotary Warbler	2021-04-29	Big Cypress Access, Illinois	37.313	-88.9824	Adult	M	Sara Lipshutz	SRR23920181	PRJNA946686	SAMN33830992
PROW954	PROW954_R5	5	Amerodectes protonotaria	Hernandes 2018	Protonotaria citrea	Boddaert 1783	Prothonotary Warbler	2021-04-29	Big Cypress Access, Illinois	37.313	-88.9824	Adult	M	Sara Lipshutz	SRR23920180	PRJNA946686	SAMN33830993
PROW954	PROW954_R20	20	Amerodectes protonotaria	Hernandes 2018	Protonotaria citrea	Boddaert 1783	Prothonotary Warbler	2021-04-29	Big Cypress Access, Illinois	37.313	-88.9824	Adult	M	Sara Lipshutz	SRR23920179	PRJNA946686	SAMN33830994
PROW981	PROW981_R1	1	Amerodectes protonotaria	Hernandes 2018	Protonotaria citrea	Boddaert 1783	Prothonotary Warbler	2021-06-14	Bluebonnet Swamp, Louisiana	30.3681	-91.1077	ASY	M	Katie Percy	SRR21738601	PRJNA884722	SAMN31063905
PROW981	PROW981_R5	5	Amerodectes protonotaria	Hernandes 2018	Protonotaria citrea	Boddaert 1783	Prothonotary Warbler	2021-06-14	Bluebonnet Swamp, Louisiana	30.3681	-91.1077	ASY	M	Katie Percy	SRR23920177	PRJNA946686	SAMN33830996
PROW981	PROW981_R20	20	Amerodectes protonotaria	Hernandes 2018	Protonotaria citrea	Boddaert 1783	Prothonotary Warbler	2021-06-14	Bluebonnet Swamp, Louisiana	30.3681	-91.1077	ASY	M	Katie Percy	SRR23920176	PRJNA946686	SAMN33830997
PROW984	PROW984_R1	1	Amerodectes protonotaria	Hernandes 2018	Protonotaria citrea	Boddaert 1783	Prothonotary Warbler	2021-06-02	Bluebonnet Swamp, Louisiana	30.3714	-91.106	ASY	M	Katie Percy	SRR23920175	PRJNA946686	SAMN33830998
PROW984	PROW984_R5	5	Amerodectes protonotaria	Hernandes 2018	Protonotaria citrea	Boddaert 1783	Prothonotary Warbler	2021-06-02	Bluebonnet Swamp, Louisiana	30.3714	-91.106	ASY	M	Katie Percy	SRR23920184	PRJNA946686	SAMN33830999
PROW984	PROW984_R20	20	Amerodectes protonotaria	Hernandes 2018	Protonotaria citrea	Boddaert 1783	Prothonotary Warbler	2021-06-02	Bluebonnet Swamp, Louisiana	30.3714	-91.106	ASY	M	Katie Percy	SRR23920183	PRJNA946686	SAMN33831000
